# Supplementary material for: Enhanced performance of a MnO2–graphene sheet cathode for lithium ion batteries using sodium alginate as a binder
Source: Royal Society of Chemistry journal article supplement (doi:10.1039/c2jm31583a), 2012-01-01
Supplement: c2jm31583a.pdf [file c2jm31583a.pdf]

# Supplementary Information for

## Enhanced Performance of a MnO<sub>2</sub>/Graphene-Sheet Cathode for Lithium ion batteries by Using Sodium Alginate as a Binder

Jiaxin Li, Yi Zhao, Ning Wang, Yunhai Ding, Lunhui, Guan<sup>§</sup>

*State Key Laboratory of Structural Chemistry Fujian Institute of Research on the Structure of Matter,  
Chinese Academy of Sciences, YangQiao West Road 155#, Fuzhou, Fujian 350002, P.R. China*

<sup>§</sup>Corresponding author. Telephone: 86-591-83792835.

Fax: 86-591-83792835. E-mail: [guanlh@fjirsm.ac.cn](mailto:guanlh@fjirsm.ac.cn)

### Supporting Experimental Section

All chemicals were of analytical grade. Graphene sheets (GS) were purchased from Xiamen Knano Graphene Technology Corporation Limited in P.R. China. MnO<sub>2</sub> nanoflakes growing on GS was synthesized by immersing GS into a KMnO<sub>4</sub> aqueous solution. 70 mg KMnO<sub>4</sub> was dispersed in 20 ml de-ionized water and heated to 80 °C. And 30 mg GS were added to the solution and the mixtures were maintained at 80 °C for 24 h. The pH of the solution was adjusted to 2.5 by adding HCl. The suspension was filtered and washed by de-ionized water, and then dried at 100 °C overnight. For comparison, pure MnO<sub>2</sub> nanoflake was directly prepared by immersing MnSO<sub>4</sub> into a KMnO<sub>4</sub> aqueous solution. The samples were characterized by X-ray diffraction test (XRD), scanning electron microscope (SEM), transmission electron microscope (TEM), X-ray photoelectron spectroscopy (XPS) and thermo-gravimetric analysis (TGA).

The electrochemical behaviors were measured *via* CR2025 coin-type test cells fabricated in a glove box filled with dry argon atmosphere. The working electrode consisted of 80 *wt.*% active material, 10 *wt.*% sodium alginate (SA) or 10 *wt.*% polyvinylidene difluoride (PVDF), and 10 *wt.*% ketjen black. The test cell consisted of working electrode ( $2.0 \pm 0.2$  mg/cm<sup>2</sup>, using steel grid as current collector) and lithium sheet which was separated by a Celgard 2300 membrane and electrolyte of 1 M LiPF<sub>6</sub> in EC :DEC :DMC (1 :1 :1 in volume). Cyclic voltammetry tests were

operated on a CHI660D Electrochemical Workstation with various scan rates. The cells were tested by Land 2001A at room temperature.

### Supporting Figures, Figure Captions and Related Depiction

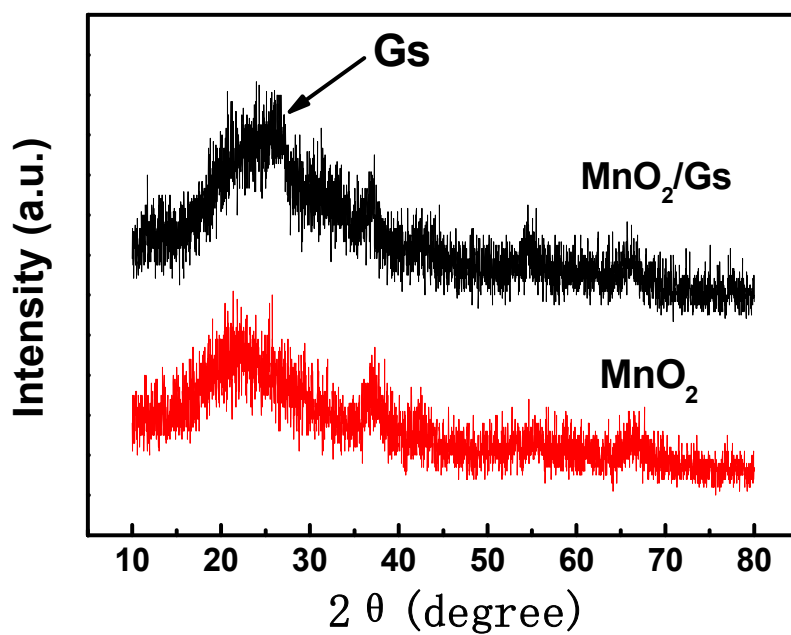

**Figure S1.** X-ray diffraction patterns of pure MnO<sub>2</sub> and MnO<sub>2</sub>/GS hybrid.

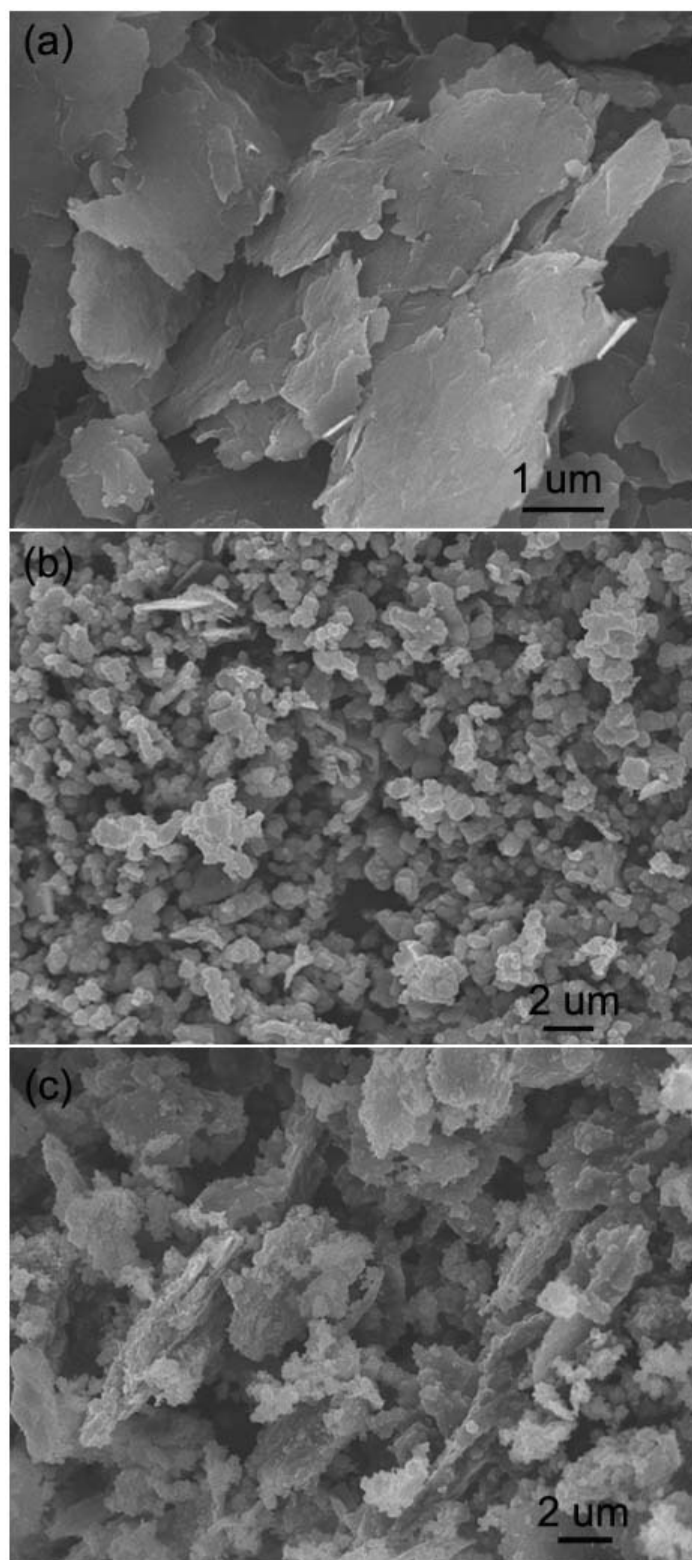

**Figure S2.** SEM images of (a) GS, (b) pure MnO<sub>2</sub> and (c) MnO<sub>2</sub>/GS hybrid.

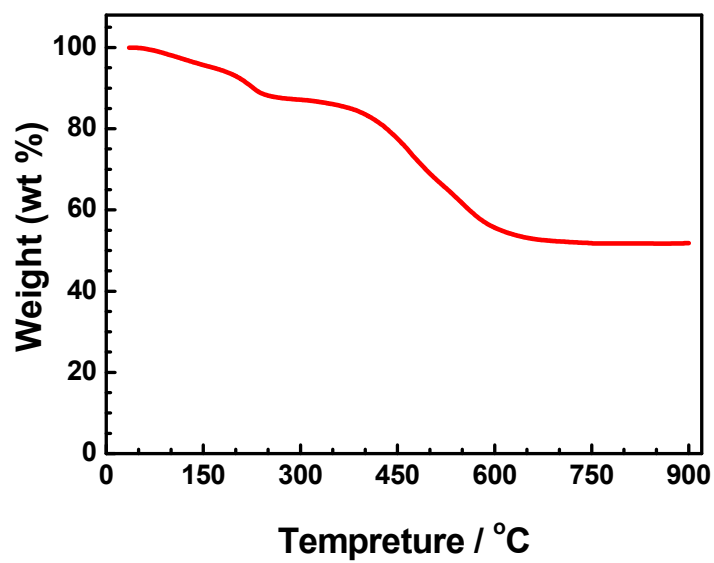

**Figure S3.** TGA curve of the MnO<sub>2</sub>/GS hybrid.

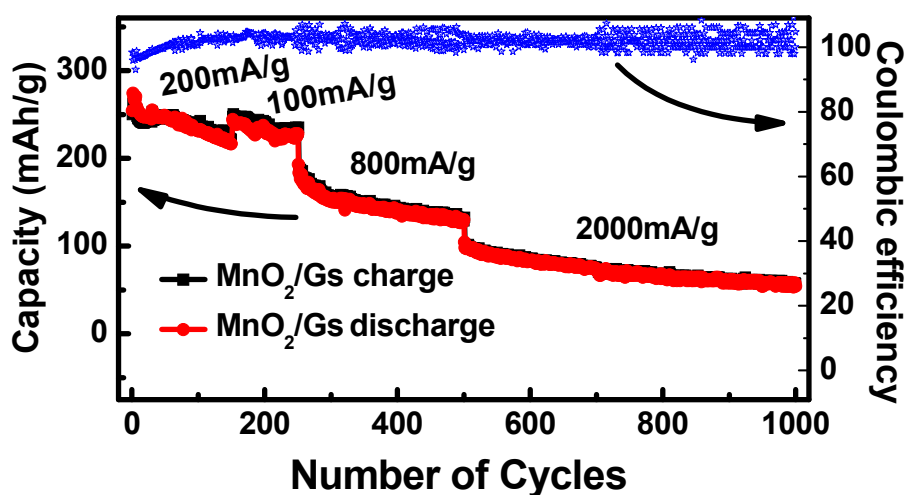

**Figure S4.** Long cycling performance and Coulombic efficiency of MnO<sub>2</sub>/GS electrode with SA binder at different current densities.

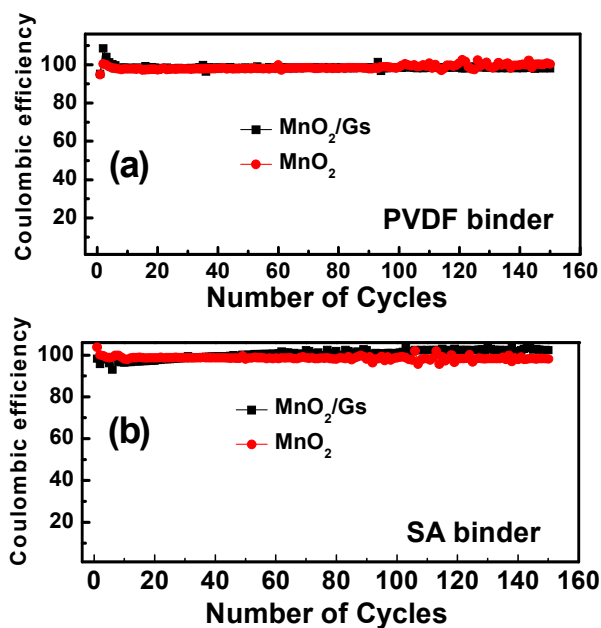

**Figure S5.** Coulombic efficiency of MnO<sub>2</sub> and MnO<sub>2</sub>/GS electrodes with SA and PVDF binders.

The Coulombic efficiency of MnO<sub>2</sub> and MnO<sub>2</sub>/GS electrodes with SA and PVDF binders were compared in figure S5. They all exhibited excellent Coulombic efficiency with ~100% retention after 150 cycles.

**Table S1.** Electrochemical performance of various MnO<sub>2</sub>-related cathode materials reported in previous works.

| Typical materials                     | Current density (mA/g) | First capacity (mA/g) | Cycle number | Remain capacity (mA/g) | Loss per cycle (mA/g) | Ref.             |
|---------------------------------------|------------------------|-----------------------|--------------|------------------------|-----------------------|------------------|
| <b>MnO<sub>2</sub></b>                | <b>50</b>              | <b>265</b>            | <b>50</b>    | <b>270</b>             | <b>-</b>              | <b>this work</b> |
|                                       | <b>200</b>             | <b>250</b>            | <b>150</b>   | <b>230</b>             | <b>0.1</b>            |                  |
|                                       | <b>800</b>             | <b>195</b>            | <b>250</b>   | <b>135</b>             | <b>0.2</b>            |                  |
|                                       | <b>2000</b>            | <b>110</b>            | <b>500</b>   | <b>55</b>              | <b>0.1</b>            |                  |
| β-MnO <sub>2</sub>                    | 300                    | 190                   | 50           | 120                    | 1.4                   | 1                |
|                                       | 600                    | 170                   | 50           | 100                    | 1.4                   |                  |
|                                       | 1500                   | 155                   | 50           | 120                    | 0.7                   |                  |
| β-MnO <sub>2</sub>                    | 15                     | 285                   | 50           | 200                    | 1.7                   | 2                |
|                                       | 30                     | 265                   | 50           | 180                    | 1.7                   |                  |
|                                       | 300                    | 210                   | 50           | 152                    | 0.8                   |                  |
| β-MnO <sub>2</sub>                    | 15                     | 185                   | 35           | 155                    | 0.9                   | 3                |
|                                       | 30                     | 112                   | 35           | 85                     | 0.8                   |                  |
| MnO <sub>2</sub> *0.5H <sub>2</sub> O | 30                     | 250                   | 30           | 180                    | 2.3                   | 4                |
| γ-MnO <sub>2</sub>                    | 50                     | 184                   | 20           | 101                    | 4.2                   | 5                |

**Refs.:**

1. Ren, Y.; Armstrong, A. R.; Jiao, F.; Bruce, P. G. *Journal of the American Chemical Society* **2009**, *132*, 996.
2. Jiao, F.; Bruce, P. G. *Advanced Materials* **2007**, *19*, 657.
3. Bach, S.; Pereira-Ramos, J. P.; Willmann, P. *Electrochimica Acta* **2011**, *56*, 10016.
4. Liu, D.; Garcia, B. B.; Zhang, Q.; Guo, Q.; Zhang, Y.; Sepehri, S.; Cao, G. *Advanced Functional Materials* **2009**, *19*, 1015.
5. Zeng, J. H.; Wang, Y. F.; Yang, Y.; Zhang, J. *Journal of Materials Chemistry* **2010**, *20*, 10915.

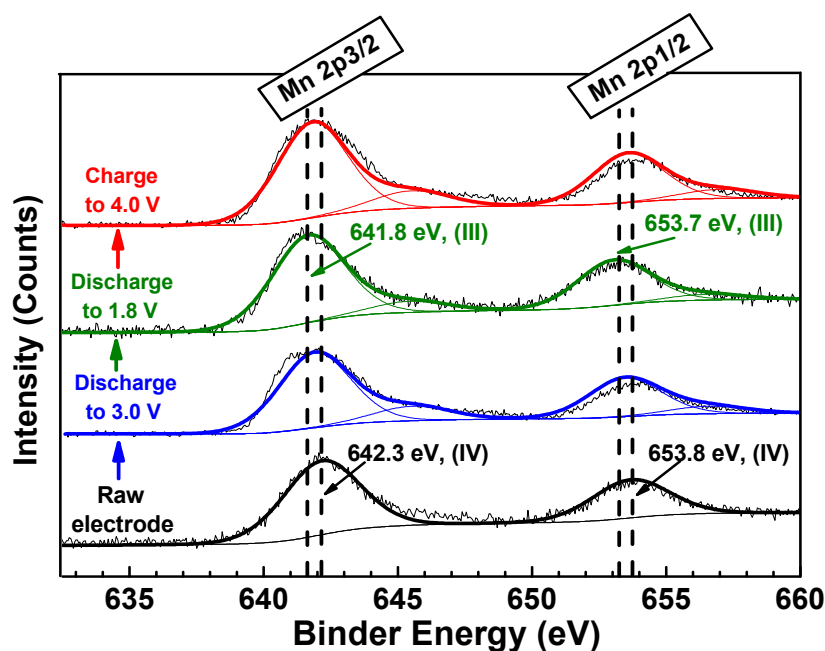

**Figure S6.** XPS spectra of Mn 2p for MnO<sub>2</sub>/GS electrode with SA during one integrated cycle.

For clearly understanding the redox mechanism of MnO<sub>2</sub>/GS electrode with SA binder, the XPS analyses for Mn valences were carried out and shown in Figure S6. From the XPS of raw electrode, the Mn 2p<sub>3/2</sub> and Mn 2p<sub>1/2</sub> peaks of the Mn(IV) chemical states appear around 642.3 and 653.8 eV. When battery is discharged to 3.0 V, the spectra shows that the Mn(III) and (IV) chemical states co-exist as the final products, corresponding to the co-existence of both LiMnO<sub>2</sub> [Mn(III)] and Li<sub>2</sub>MnO<sub>3</sub> [Mn(IV)] phases.<sup>1,2</sup> And there only exist Mn(III) chemical states (LiMnO<sub>2</sub>) when battery is further discharged to 1.8 V. Note that the ratio of the peak intensity of Mn(III) almost disappeared and the Mn(IV) increased with the increasing voltage charged back to 4.0 V. Therefore, the reversible capacity of MnO<sub>2</sub> is theoretically derived from the reversible transformation between LiMnO<sub>2</sub> and MnO<sub>2</sub> phases during cycles. The high capacity of MnO<sub>2</sub>/GS with SA depends on this available phase transformation.

## Refs:

1. Lee, J.; Lee, J.-M.; Yoon, S.; Kim, S.-O.; Sohn, J.-S.; Rhee, K.-I.; Sohn, H.-J. *Journal of Power Sources* **2008**, *183*, 325.
2. Ogata, A.; Komaba, S.; Baddourhadjean, R.; Pereiramos, J.; Kumagai, N. *Electrochimica Acta* **2008**, *53*, 3084

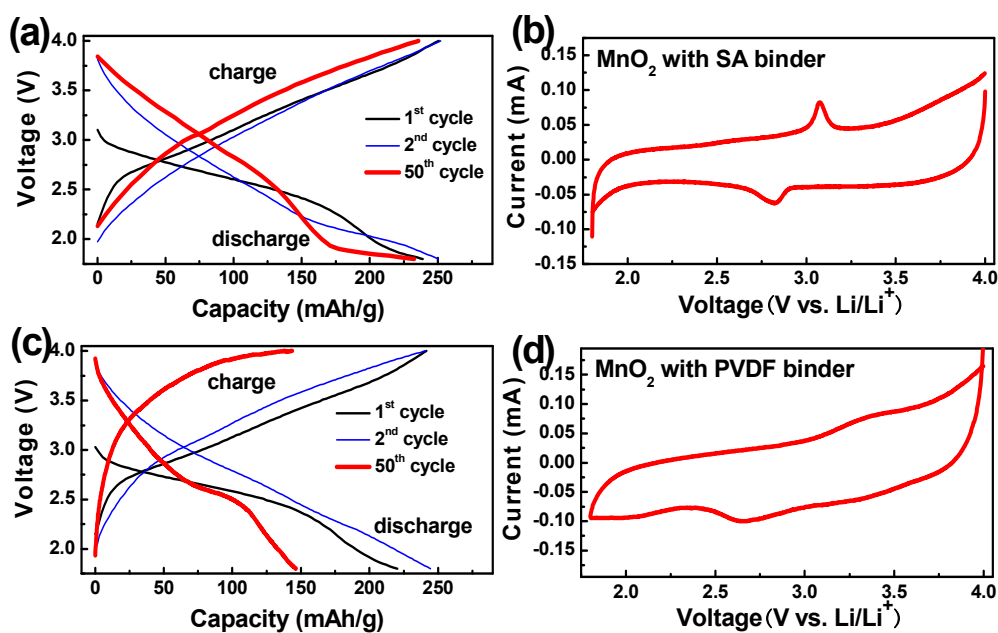

**Figure S7.** Discharge /charge (D /C) voltage profiles at 1<sup>st</sup>, 2<sup>nd</sup> and 50<sup>th</sup> cycles of MnO<sub>2</sub> electrodes with (a) SA and (b) with PVDF; (c) and (d) the corresponding cyclic voltammogram (CV) curves of each electrode after 100 cycles at a scan rate of 0.5 mV/s.

Note that the redox peaks of MnO<sub>2</sub> (see Figure S7d) almost disappear. This result is consistent with the pure MnO<sub>2</sub> related electrodes reported previously, which may be related to the expansion and aggregation during cycling (without both SA binder and GS buffer carrier) leading to increase impedance and further severe polarization.



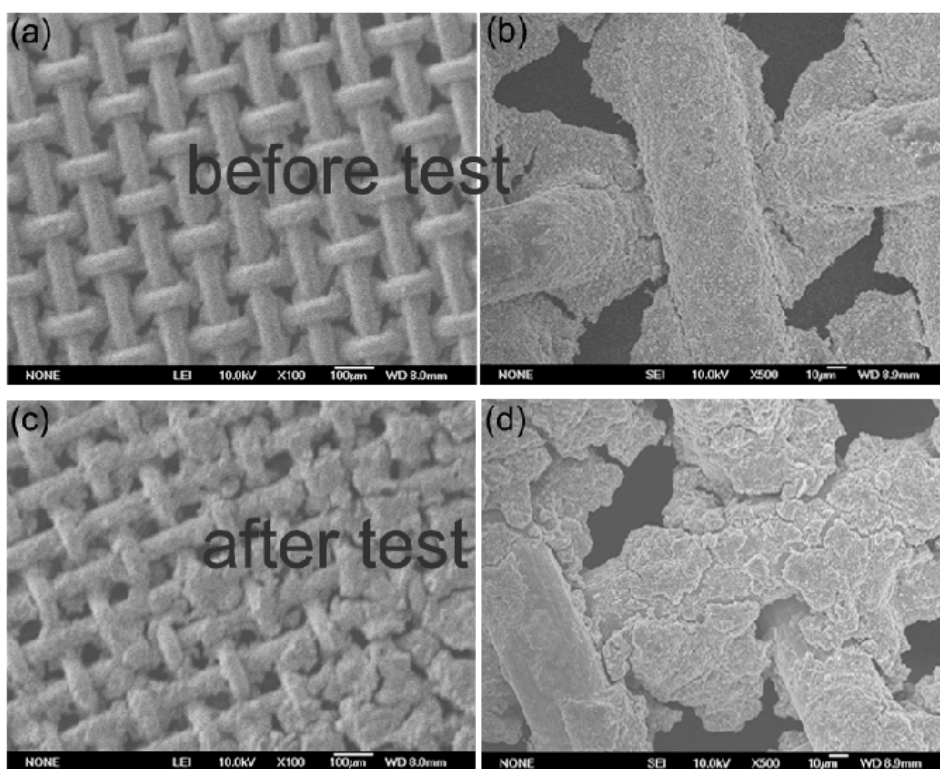

**Figure S8.** SEM images of MnO<sub>2</sub> electrode with PVDF before and after test.

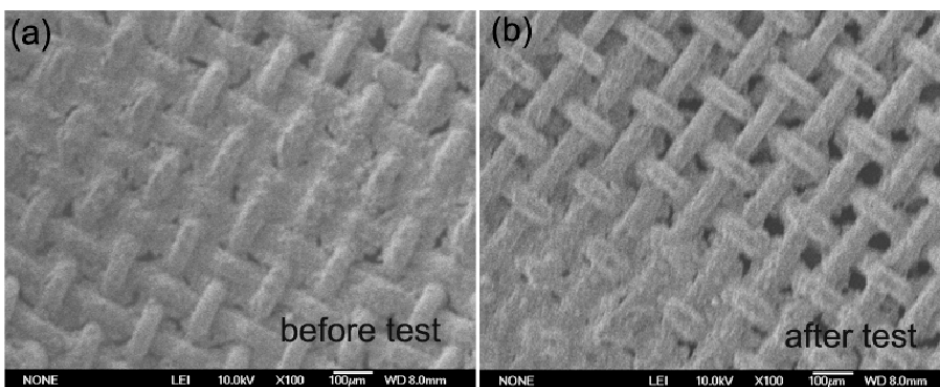

**Figure S9.** SEM images of MnO<sub>2</sub> with SA before and after test.
